# Supplementary material for: Unusual C=C Bond Isomerization of an α,β-Unsaturated γ-Butyrolactone Catalysed by Flavoproteins from the Old Yellow Enzyme Family
Source: PubMed Central journal article supplement (PMC3533789; doi:10.1002/cbic.201200475), 2012-09-28
Supplement: cbic0013-2346-SD1.pdf [file cbic0013-2346-SD1.pdf]

## Supporting Information

© Copyright Wiley-VCH Verlag GmbH & Co. KGaA, 69451 Weinheim, 2012

### **Unusual C=C Bond Isomerization of an $\alpha,\beta$ -Unsaturated $\gamma$ -Butyrolactone Catalysed by Flavoproteins from the Old Yellow Enzyme Family**

Katharina Durchschein,<sup>[a]</sup> Silvia Wallner,<sup>[b]</sup> Peter Macheroux,<sup>[b]</sup> Klaus Zangger,<sup>[a]</sup>  
Walter M. F. Fabian,<sup>[a]</sup> and Kurt Faber\*<sup>[a]</sup>

cbic\_201200475\_sm\_miscellaneous\_information.pdf

## Electronic Supporting Information

|                                                                      |    |
|----------------------------------------------------------------------|----|
| C=C-Bond isomerization/cyclization in $\beta$ -carotene biosynthesis | S2 |
| Source of chemicals, cofactors and enzymes                           | S2 |
| Theoretical calculations                                             | S3 |
| Isomerization under inert atmosphere                                 | S3 |
| Deuterium labelling studies                                          | S4 |
| Analytical methods                                                   | S5 |
| References                                                           | S6 |

**Scheme S1.** C=C-Bond isomerization/cyclization in  $\beta$ -carotene biosynthesis catalyzed by carotene *cis-trans* isomerase (CrtIso) and lycopene cyclase (CrtY).

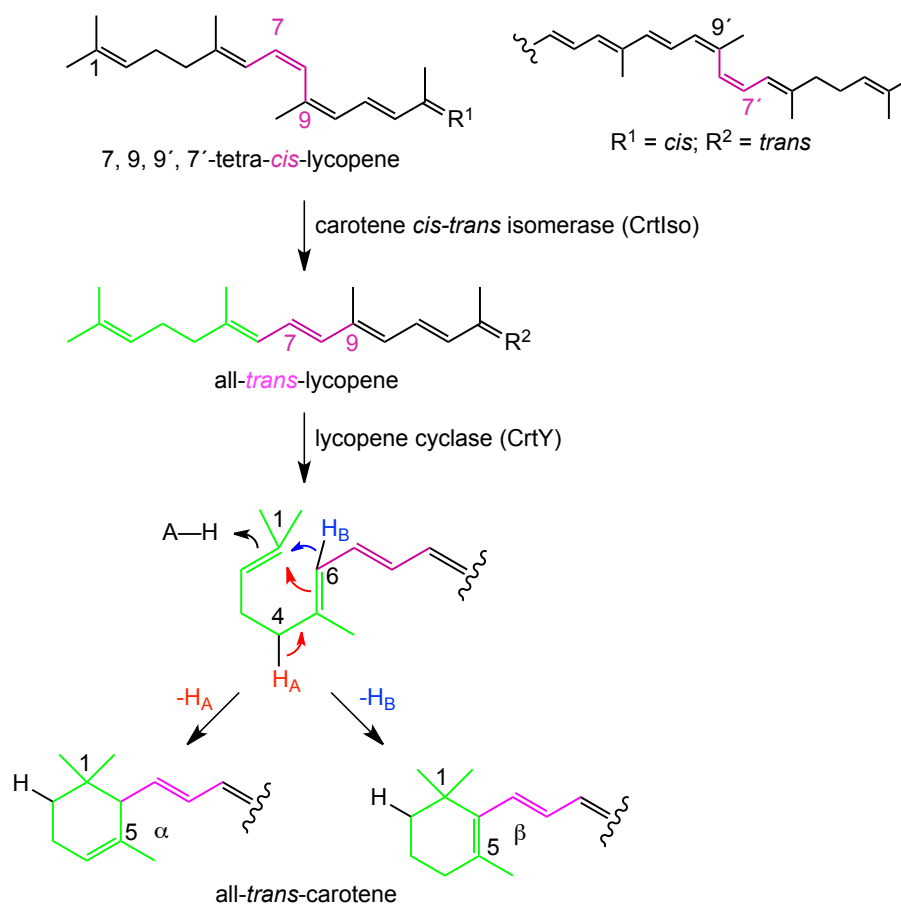

### Source of chemicals, cofactors and enzymes

$\alpha$ -Methylene- $\gamma$ -butyrolactone (**1a**), 3-methyl-furan2(5H)-one (**2a**), *rac*- $\alpha$ -methyl- $\gamma$ -butyrolactone (**1b**) and bovine albumin were purchased from Sigma Aldrich, glucose and NAD<sup>+</sup> were from Fluka. NADH and NADPH were from AppliChem and NADP<sup>+</sup> was from Biocatalytics. Glucose-6-phosphate and glucose-6-phosphate dehydrogenase were obtained from Biochemica and glucose dehydrogenase were obtained from Jülich Chiral Solutions. *i*-Propanol-d<sub>8</sub> (label >99%) was from Sigma Aldrich.

### Preparation of enzymes

OPR1 from *Lycopersicon esculentum*, YqjM<sup>[1,2,3]</sup> and YhdA<sup>[4]</sup> from *Bacillus subtilis* were overexpressed and purified as previously reported. Cloning and purification of OYEs from yeasts (OYE1 from *Saccharomyces carlsbergensis*, OYE2 and OYE3 from *Saccharomyces cerevisiae*) and nicotinamide-dependent cyclohexenone reductase (NCR) from *Zymomonas mobilis* was performed according to literature.<sup>[5,6]</sup> Xenobiotic reductases A (XenA) and B (XenB) from *Pseudomonas putida* and *P. fluorescens*, respectively,<sup>[7]</sup> and estrogen-binding protein (EBP1) from

*Candida albicans* were obtained as recently published.<sup>[8]</sup> KYE was provided by A. Bommarius (Georgia Institute of Technology, Atlanta, USA), the expression and purification was followed according to the published protocol<sup>[9]</sup> with an additional gel filtration step using Superdex 75. Ycnd was cloned, expressed and purified according to the literature.<sup>[10]</sup>

### Theoretical calculations

Geometries were optimized by second order perturbation theory<sup>[11]</sup> using Dunning's double-zeta correlation consistent basis set<sup>[12]</sup> (MP2/cc-pVDZ). Zero point energy and thermal corrections to Gibbs free energies were obtained by the standard harmonic oscillator-rigid rotor approximation using the same level of theory. The complete basis set limit (MP2/CBS) was estimated using Martin's extrapolation scheme<sup>[13]</sup> in combination with the cc-pVnZ, n = 2-4, basis set. Higher electron correlation effects were estimated by coupled-cluster calculations<sup>[14]</sup> in combination with a two-point extrapolation<sup>[15]</sup> to the basis set limit [CCSD(T)/cc-pVnZ, n = 2-3]. Solvent effects (aqueous solution) were estimated by the SM8 solvation model<sup>[16]</sup> using the M06-2X density functional<sup>[17]</sup> in combination with the 6-31+G(d,p) basis set.<sup>[18]</sup> Programs used were: NWChem 6.0,<sup>[19]</sup> GAMESSPLUS,<sup>[20]</sup> and MOLDEN<sup>[21]</sup> for visualization. The  $\Delta G$  of the isomerization reaction of **1a** to **2a** was determined to be -9 kcal/mol.

**Table S1.** Gibbs free energies [kcal mol<sup>-1</sup>] of isomerization of **1a** to **2a**.

| Method      | Gas phase | Aqueous solution |
|-------------|-----------|------------------|
| MP2/CBS     | 8.7       | 9.5              |
| CCSD(T)/CBS | 8.0       | 8.8              |

### Isomerization under inert atmosphere

An aliquot of enzyme (OYE2, final protein concentration 10  $\mu$ M) in Tris-HCl buffer solution (50 mM, pH 7.5) was mixed with equal amounts of NADH (10  $\mu$ M) to fully reduce the flavin cofactor. The reduced enzyme solution was then supplemented with substrate **1a** at various concentrations (0.1 mM - 20 mM) and reaction mixtures were incubated at 30 °C and 120 rpm in an oxygen-free atmosphere in a glove box (Belle Technology, ~0.8 ppm O<sub>2</sub>). After 24 h the reactions were stopped and the product was extracted with EtOAc (2  $\times$  0.5 mL). The combined organic phases were dried over Na<sub>2</sub>SO<sub>4</sub> and analysed on achiral GC to determine the conversion.

**Table S2.** Isomerization of **1a** to **2a** using equimolar amounts of NADH (10  $\mu$ M) and OYE2 (10  $\mu$ M) under exclusion of O<sub>2</sub>.

| Substrate [mM]                                                                                 | Product [ $\mu$ M]                                                                              |
|------------------------------------------------------------------------------------------------|-------------------------------------------------------------------------------------------------|
| <br><b>1a</b> | <br><b>2a</b> |
| 0.5                                                                                            | 30                                                                                              |
| 1                                                                                              | 30                                                                                              |
| 5                                                                                              | 50                                                                                              |
| 10                                                                                             | 400                                                                                             |
| 20                                                                                             | 1400                                                                                            |

Reaction conditions: NADH (10  $\mu$ M), OYE2 (10  $\mu$ M), **1a** (0.5 - 20 mM), 24 h, N<sub>2</sub> atmosphere; n.d. = not determined;

### Deuterium labeling studies

For up-scaling of the biotransformation of **1a**, 60 samples were prepared in the following way: an aliquot of enzyme (OYE2 200  $\mu$ g/mL) was added to a Tris-HCl D<sub>2</sub>O buffer solution (0.8 mL, 50 mM, pH 7.5) containing the substrate (10 mM), the cofactor NAD<sup>+</sup> (100  $\mu$ M), the recycling-system ADH-A (10 U), *i*-propanol-d<sub>8</sub> (15 mM). The mixture was shaken at 30 °C and 120 rpm. After 48h the products were extracted with CDCl<sub>3</sub> (2  $\times$  0.5 mL). The combined organic phases were dried over Na<sub>2</sub>SO<sub>4</sub> and analysed via <sup>13</sup>C- and <sup>2</sup>H-NMR. For the acquisition of <sup>2</sup>H spectra CDCl<sub>3</sub> was evaporated and replaced by CHCl<sub>3</sub>.

**$\alpha$ -Methylene- $\gamma$ -butyrolactone (1a):** <sup>1</sup>H-NMR (300MHz, CDCl<sub>3</sub>):  $\delta$  2.94-2.99 (2H, m), 4.36 (CH<sub>2</sub>-O, t, J=7.35), 5.66 (1H, s), 6.23 (1H, s); <sup>13</sup>C-NMR (75MHz, CDCl<sub>3</sub>):  $\delta$  27.38, 65.34, 122.3, 133.6, 170.8. NMR data corresponded to literature.<sup>[22, 23]</sup>

**3-Methylfuran-2(5H)-one (2a):** <sup>1</sup>H-NMR (300MHz, CDCl<sub>3</sub>):  $\delta$  1.91 (3H, m), 4.74 (2H, m), 7.13 (1H, m); <sup>13</sup>C-NMR (75MHz, CDCl<sub>3</sub>):  $\delta$  10.76, 70.12, 129.93, 145.11, 174.96. NMR data corresponded to literature.<sup>[24]</sup> For partially deuterated **2a**: <sup>13</sup>C-NMR (700MHz, CDCl<sub>3</sub>):  $\delta$  10.70 (CH<sub>3</sub>), 10.35, 10.46, 10.57 (CH<sub>2</sub>-D), 70.02 (OCH<sub>2</sub>), 129.92 (CH=C), 144.95 (C=CH), 174.96 (CO).

**$\alpha$ -Methyl- $\gamma$ -butyrolactone (1b):** <sup>1</sup>H-NMR (300MHz, CDCl<sub>3</sub>):  $\delta$  1.27 (3H, d, J=7.02), 1.87-1.97 (1H, m), 2.37-2.46 (1H, m), 2.55-2.63 (1H, m), 4.13-4.21 (1H, m), 4.29-4.36 (1H, m); <sup>13</sup>C-NMR (75MHz, CDCl<sub>3</sub>):  $\delta$  15.28, 30.81, 34.26, 66.37, 180.3. NMR data corresponded to literature.<sup>[25]</sup> <sup>2</sup>H-NMR (46 MHz, CHCl<sub>3</sub>):  $\delta$  2.66, 4.80.

**Table S3.** <sup>2</sup>H-Labeling experiments.

| Conditions                                                                                                                       | Products (relative amounts) <sup>[a]</sup>                                         |
|----------------------------------------------------------------------------------------------------------------------------------|------------------------------------------------------------------------------------|
| D <sub>2</sub> O Tris-HCl 50mM pH 7.5/<br>OYE2/ <b>1a</b> /NADH <sup>[b]</sup>                                                   | 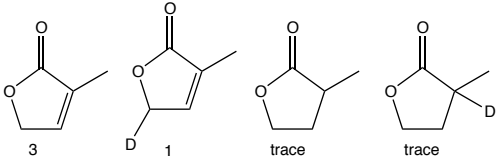 |
| H <sub>2</sub> O Tris-HCl 50mM pH 7.5/<br>OYE2/ <b>1a</b> / <i>i</i> -PrOH-d <sub>8</sub> /ADH-A/NAD <sup>+</sup> <sup>[c]</sup> |  |
| D <sub>2</sub> O Tris-HCl 50mM pH 7.5/<br>OYE2/ <b>1a</b> / <i>i</i> -PrOH-d <sub>8</sub> /ADH-A/NAD <sup>+</sup> <sup>[d]</sup> |  |

<sup>[a]</sup> Monitored via <sup>13</sup>C-NMR (700MHz spectrometer) and <sup>2</sup>H-NMR (300 MHz spectrometer); <sup>[b]</sup> H/D-scrambling of FMNH<sub>2</sub> with D<sub>2</sub>O involves deuteration on C4 of **2a**; <sup>[c]</sup> H/D-scrambling between FMND<sub>2</sub> or FMNHD in H<sub>2</sub>O is not visible; <sup>[d]</sup> no H/D-scrambling.

### Analytical methods

GC-MS analyses were performed on a HP 6890 Series GC system equipped with a 5973 mass selective detector and a 7683 Series injector using a (5%-phenyl)-methylpolysiloxane capillary column (HP-5Msi, 30 m x 0.25 mm, 0.25 μm film). GC-FID analyses were carried out on a Varian 3800 using H<sub>2</sub> as carrier gas (14.5 psi). HPLC analyses were performed on a Shimadzu system equipped with a Chiralcel OD-H column (25 cm x 0.46 cm).

### Determination of conversion

**Table S3** Determination of conversion via achiral GC-analyses.

| Substrate | Column | Program | Compound  | T <sub>ret</sub> [min] | Compound  | T <sub>ret</sub> [min] |
|-----------|--------|---------|-----------|------------------------|-----------|------------------------|
| <b>1a</b> | A      | a       | <b>1a</b> | 9.23                   | <b>1b</b> | 7.87                   |
| <b>2a</b> | A      | a       | <b>2a</b> | 9.02                   | <b>1b</b> | 7.87                   |
| <b>1a</b> | B      | b       | <b>1a</b> | 7.08-7.09              | <b>1b</b> | 6.72-6.75              |
| <b>2a</b> | B      | b       | <b>2a</b> | 6.98-7.03              | <b>1b</b> | 6.72-6.75              |

Columns:

A = DB-1701 (14 % cyanopropyl-phenylphase capillary column, 30 m x 0.25 mm, 0.25 μm film), H<sub>2</sub> as carrier gas (14.5 psi), detector temperature 250 °C, split ratio 20:1.

B= GC-MS, HP-5 Msi (5%-phenyl-methylpolysiloxane capillary column, 30 m x 0.25 mm, 0.25  $\mu\text{m}$  film), 0.69 psi H<sub>2</sub> as carrier gas, front inlet temperature 250 °C, split ratio 90:1.

Programs:

a = 110 °C, hold 5 min, 30 °C/min to 200 °C, hold 2 min.

b = 40 °C, hold 2 min, 20 °C/min to 180 °C, hold 1min.

**Table S4.** Determination of enantiomeric excess via chiral GC- and HPLC-analyses.

| Substrate | Column | Conditions      | Substrate                 | Product                                |                                        |
|-----------|--------|-----------------|---------------------------|----------------------------------------|----------------------------------------|
|           |        |                 | ( <b>1a</b> , <b>2a</b> ) | <b>1b</b>                              |                                        |
|           |        |                 | T <sub>ret</sub> [min]    | T <sub>ret</sub> [min]<br>( <i>R</i> ) | T <sub>ret</sub> [min]<br>( <i>S</i> ) |
| <b>1a</b> | C      | c               | n.d                       | <b>1b</b> 63.92                        | <b>1b</b> 69.31                        |
|           | D      | d               | <b>1a</b> 20.4            | <b>1b</b> 15.40                        | <b>1b</b> 15.21                        |
|           |        |                 | <b>2a</b> 19.38           |                                        |                                        |
| E         | d      | <b>1a</b> 11.61 | <b>1b</b> 11.23           | <b>1b</b> 10.82                        |                                        |
|           |        | <b>2a</b> 11.44 |                           |                                        |                                        |
| <b>2a</b> | C      | c               | n.d                       | <b>1b</b> 63.92                        | <b>1b</b> 69.31                        |
|           | D      | d               | <b>2a</b> 19.38           | <b>1b</b> 15.40                        | <b>1b</b> 15.21                        |
|           |        |                 | <b>2a</b> 11.44           | <b>1b</b> 11.23                        | <b>1b</b> 10.82                        |

n.d. not determined.

Columns:

C = HPLC analysis employing a Chiralcel OD-H column (25 cm x 0.46 cm).

D = GC-analysis using a trifluoroacetyl  $\beta$ -cyclodextrin capillary column, detector temperature 200 °C, split ratio 20:1, H<sub>2</sub> as carrier gas (14.5 psi)

E = GC-analysis using a hydrodex- $\beta$ -6TBDM capillary column, detector temperature 200 °C, split ratio 20:1, H<sub>2</sub> as carrier gas (14.5 psi)

Conditions:

c = *n*-heptane/2-propanol 99:1, 0.25 mL/min, detection at 216 nm.

d = 120 °C, hold 20 min, 15 °C/min to 180 °C, hold 2 min.

## References

- [1] C. Breithaupt, R. Kurzbauer, H. Lilie, A. Schaller, J. Strassner, R. Huber, P. Macheroux, T. Clausen, *Proc. Natl. Acad. Sci. USA* **2006**, *103*, 14337-14342.
- [2] K. Kitzing, T. B. Fitzpatrick, C. Wilken, J. Sawa, G. P. Bourenkov, P. Macheroux, T. Clausen,

- J. Biol. Chem.* **2005**, *280*, 27904-27913.
- [3] M. Hall, C. Stueckler, W. Kroutil, P. Macheroux, K. Faber, *Angew. Chem. Int. Ed.* **2007**, *46*, 3934-3937.
- [4] S. Deller, S. Sollner, R. Trenker-El-Toukhy, I. Jelesarov, G. M. Gübitz, P. Macheroux, *Biochemistry* **2006**, *45*, 7083-7091.
- [5] M. Hall, C. Stueckler, B. Hauer, R. Stuermer, T. Friedrich, M. Breuer, W. Kroutil, K. Faber, *Eur. J. Org. Chem.* **2008**, 1511-1516.
- [6] A. Müller, B. Hauer, B. Rosche, *Biotechnol. Bioeng.* **2007**, *98*, 22-29.
- [7] D. S. Blehert, B. G. Fox, G. H. Chambliss, *J. Bacteriol.* **1999**, *181*, 6254-6263.
- [8] J. Buckman, S. M. Miller, *Biochemistry* **1998**, *37*, 14326-14336.
- [9] J. F. Chaparro-Riggers, T. A. Rogers, E. Vazquez-Figueroa, K. M. Polizzi, A. S. Bommarius, *Adv. Synth. Catal.* **2007**, *349*, 1521-1531.
- [10] A. Morokutti, A. Lyskowski, S. Sollner, E. Pointner, T. B. Fitzpatrick, C. Kratky, K. Gruber, P. Macheroux, *Biochemistry* **2005**, *44*, 13724-13733.
- [11] C. Möller, M. S. Plesset, *Phys. Rev.* **1934**, *46*, 618-622.
- [12] (a) T. H. Dunning, *J. Chem. Phys.* **1989**, *90*, 1007-1023; (b) R. A. Kendall, T. H. Dunning, R. J. Harrison, *J. Chem. Phys.* **1992**, *96*, 6796-6806.
- [13] J. M. L. Martin, *Chem. Phys. Lett.* **1996**, *259*, 669-678.
- [14] R. J. Bartlett, In *Coupled-Cluster Theory: An Overview of Recent Developments*; D. R. Yarkony, Ed.; *Advanced Series in Physical Chemistry: Modern Electronic Structure Theory*; World Scientific Publishing Co., Singapore, **1995**, Vol. 2, pp. 1047-1131.
- [15] S. K. Min, E. C. Lee, H. M. Lee, D. Y. Kim, D. Kim, K. S. Kim, *J. Comput. Chem.* **2008**, *29*, 1208-1221.
- [16] a) C. J. Cramer, D. G. Truhlar, *Acc. Chem. Res.* **2008**, *41*, 760-768; b) A. V. Marenich, R. M. Olson, C. P. Kelly, C. J. Cramer, D. G. Truhlar, *J. Chem. Theory Comput.* **2007**, *3*, 2011-2033.
- [17] a) Y. Zhao, D. G. Truhlar, *Theor. Chem. Acc.* **2008**, *120*, 215-241; b) Y. Zhao, D. G. Truhlar, *Acc. Chem. Res.* **2008**, *41*, 157-167.
- [18] a) W. J. Hehre, R. Ditchfield, J. A. Pople, *J. Chem. Phys.* **1972**, *56*, 2257-2261; b) T. Clark, J. Chandrasekhar, G. W. Spitznagel, P. v. R. Schleyer, *J. Comp. Chem.* **1983**, *4*, 294-301; c) R. Krishnan, J. S. Binkley, R. Seeger, J. A. Pople, *J. Chem. Phys.* **1980**, *72*, 650-654; d) P. M. W. Gill, B. G. Johnson, J. A. Pople, M. J. Frisch, *Chem. Phys. Lett.* **1992**, *197*, 499-505;
- [19] M. Valiev, E. J. Bylaska, N. Govind, K. Kowalski, T. P. Straatsma, H. J. J. Van Dam, D. Wang, J. Nieplocha, E. Apra, T. L. Windus, W. A. de Jong, *Comput. Phys. Commun.* **2010**, *181*, 1477-1489.



- [20] a) M. W. Schmidt, K. K. Baldrige, J. A. Boatz, S. T. Elbert, M. S. Gordon, J. H. Jensen, S. Koseki, N. Matsunaga, K. A. Nguyen, S. Su, T. L. Windus, M. Dupuis, J. A. Montgomery, *J. Comput. Chem.* **1993**, *14*, 1347–1363; b) M. Higashi, A. V. Marenisch, R. M. Olson, A. C. Chamberlin, J. Pu, C. P. Kelly, J. D. Thompson, J. D. Xidos, J. Li, T. Zhu, G. D. Hawkins, Y. Y. Chuang, P. L. Fast, B. J. Lynch, D. A. Liotard, D. Rinaldi, J. Gao, C. J. Cramer, D. G. Thruhlar, *GAMESSPLUS - Version 2009*, University of Minnesota, Minneapolis, **2009**.
- [21] G. Schaftenaar, J. H. Noordik, *J. Comput.-Aided Mol. Des.* **2000**, *14*, 123-134.
- [22] H. Saimoto, K. Nishio, H. Yamamoto, M. Shinoda, *Bull. Chem. Soc. Jpn.* **1983**, *56*, 3093-3098.
- [23] L. P. Christensen, *Photochemistry* **1999**, *51*, 969-974.
- [24] J. Boukouvalas, R. P. Loach, *J. Org. Chem.* **2008**, *73*, 8109-8112.
- [25] B. B. M. Ostermeier, C. Korff, G. Helmchen, *Eur. J. Org. Chem.* **2003**, *17*, 3453–3459.
